# Supplementary material
Source: PubMed Central journal article supplement (PMC6447072)
Supplement: NIHMS1522766-supplement-1.pdf [file NIHMS1522766-supplement-1.pdf]

**Supplemental Information**

**Myeloid Cells Restrict MCMV**

**and Drive Stress-Induced**

**Extramedullary Hematopoiesis through STAT1**

**Riem Gawish, Tanja Bulat, Mario Biaggio, Caroline Lassnig, Zsuzsanna Bago-Horvath, Sabine Macho-Maschler, Andrea Poelzl, Natalija Simonović, Michaela Prchal-Murphy, Rita Rom, Lena Amenitsch, Luca Ferrarese, Juliana Kornhoff, Therese Lederer, Jasmin Svinka, Robert Eferl, Markus Bosmann, Ulrich Kalinke, Dagmar Stoiber, Veronika Sexl, Astrid Krmpotic, Stipan Jonjic, Mathias Müller, and Birgit Strobl**

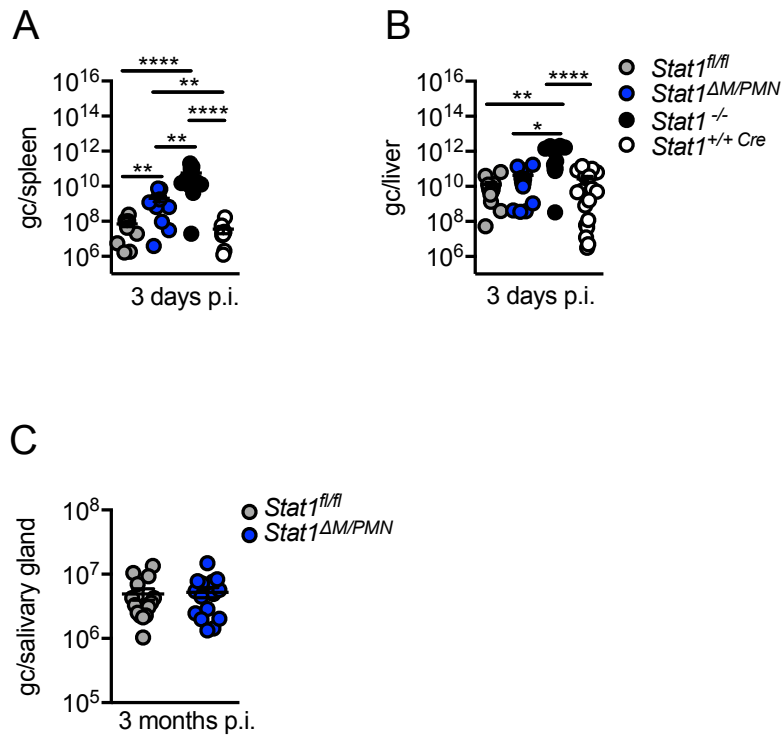

**Figure S1. Related to Figure 1. Myeloid cells suppress early MCMV replication in the spleen through STAT1.**

**(A, B)** MCMV genome copy number (gc) in **(A)** spleen (n=10-12, N=2) and **(B)** liver (n=12-18, N=2-3) of *Stat1<sup>fl/fl</sup>*, *Stat1<sup>ΔM/PMN</sup>*, *Stat1<sup>-/-</sup>* and *Stat1<sup>+/+ Cre</sup>* mice after i.p. infection with  $5 \times 10^4$  PFU of MCMV. **(C)** MCMV genome copy number in salivary glands of *Stat1<sup>fl/fl</sup>* and *Stat1<sup>ΔM/PMN</sup>* mice 3 months after i.p. infection with  $2.5 \times 10^4$  PFU of MCMV (n=14-15, N=2). Mean values  $\pm$  SEM are given. n, biological replicates; N, experimental repetitions; \*  $p \leq 0.05$ , \*\*  $p \leq 0.01$ , \*\*\*\*  $p \leq 0.0001$ .

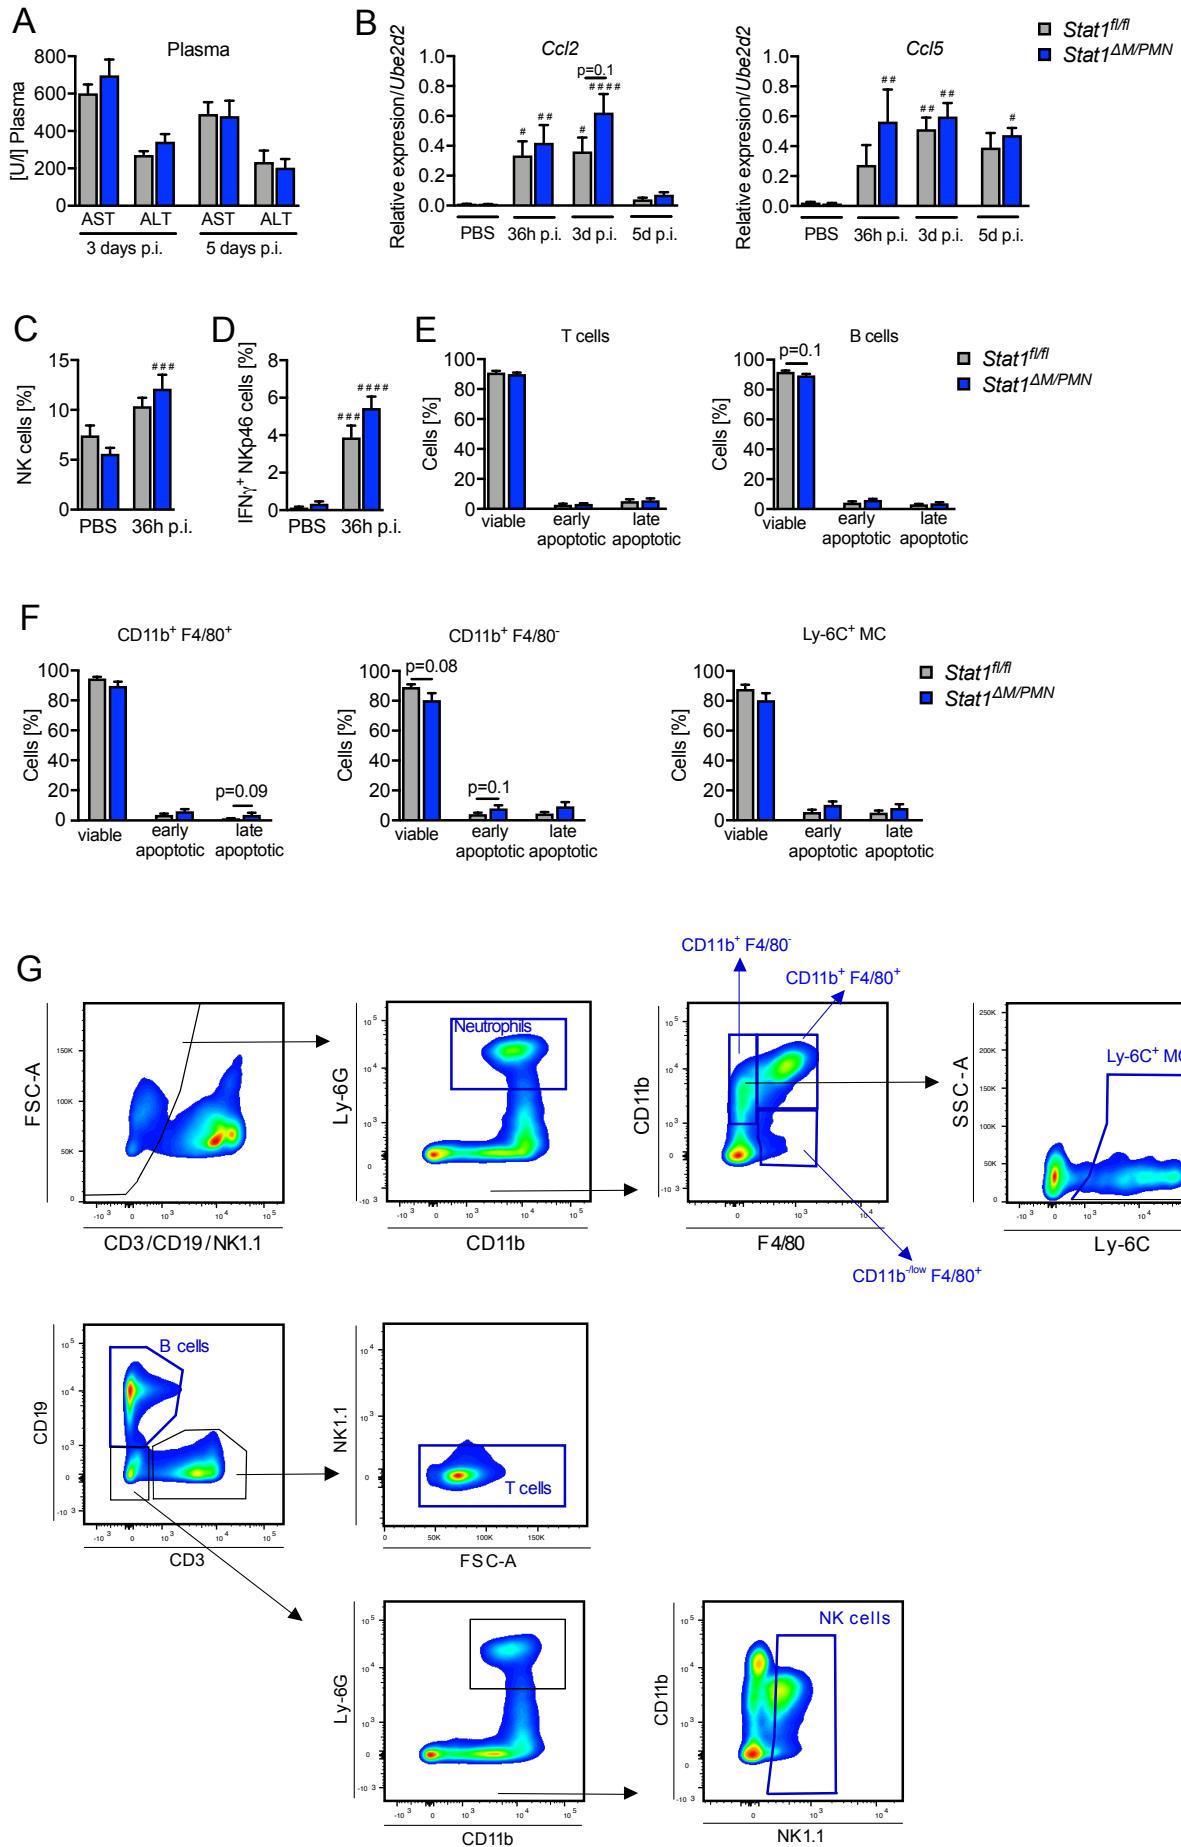

**Figure S2. Related to Figure 2. Myeloid STAT1 protects from MCMV-induced spleen pathology.**

**(A)** Blood was collected at indicated time points and levels of AST and ALT were determined in the plasma of controls (PBS) and MCMV infected mice (n=9-14, N=2-4)

**(B)** Relative mRNA expression levels of *Ccl2* and *Ccl5* in the liver at indicated time points p.i. (n=8, N=2). **(C)** Percentage of liver NK cells and **(D)** percentage of IFN $\gamma$ -producing liver NK cells in infected and PBS treated *Stat1<sup>fl/fl</sup>* and *Stat1 $\Delta M/PMN$*  mice (n=5-6, N=2).

**(E, F)** Flow cytometric analysis of apoptotic cells in spleens of MCMV-infected mice (day 3 p.i.). Percentage of viable, early apoptotic and late apoptotic **(E)** T cells and B cells and **(F)** CD11b<sup>+</sup> F4/80<sup>+</sup>, CD11b<sup>+</sup> F4/80<sup>-</sup> and Ly-6C<sup>+</sup> monocytes (MC); n=7-8, N=2. **(A-F)** Mean values  $\pm$  SEM are given. #  $p \leq 0.05$ , ##  $p \leq 0.01$ , ###  $p \leq 0.001$ , ###  $p \leq 0.0001$ , statistical significance relative to the PBS control; n, biological replicates; N, experimental repetitions.

**(G)** Gating strategy for neutrophils (CD3<sup>-</sup> CD19<sup>-</sup> NK1.1<sup>-</sup> Ly-6G<sup>+</sup> CD11b<sup>+</sup>), CD11b<sup>+</sup>F4/80<sup>-</sup> monocytes/DCs (CD3<sup>-</sup>CD19<sup>-</sup> NK1.1<sup>-</sup> Ly-6G<sup>-</sup> CD11b<sup>+</sup> F4/80<sup>-</sup>), CD11b<sup>+</sup> F4/80<sup>+</sup> macrophages/monocytes (CD3<sup>-</sup> CD19<sup>-</sup> NK1.1<sup>-</sup> Ly-6G<sup>-</sup> CD11b<sup>+</sup> F4/80<sup>+</sup>), CD11b<sup>-/low</sup> F4/80<sup>+</sup> macrophages (CD3<sup>-</sup> CD19<sup>-</sup> NK1.1<sup>-</sup> Ly-6G<sup>-</sup> CD11b<sup>-/low</sup> F4/80<sup>+</sup>), B cells (CD19<sup>+</sup> CD3<sup>-</sup>), T cells (CD19<sup>-</sup> CD3<sup>+</sup> NK1.1<sup>-</sup>) and NK cells (CD19<sup>-</sup> CD3<sup>-</sup> Ly-6G<sup>-</sup> CD11b<sup>-/int</sup> NK1.1<sup>+</sup>).

**A**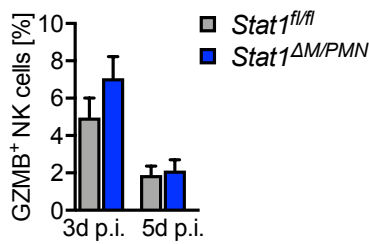**B**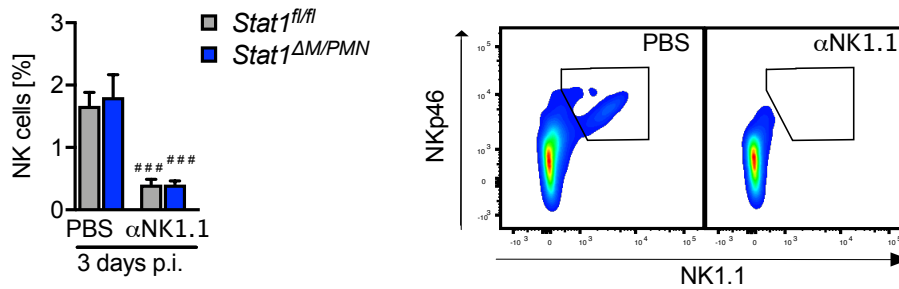**C**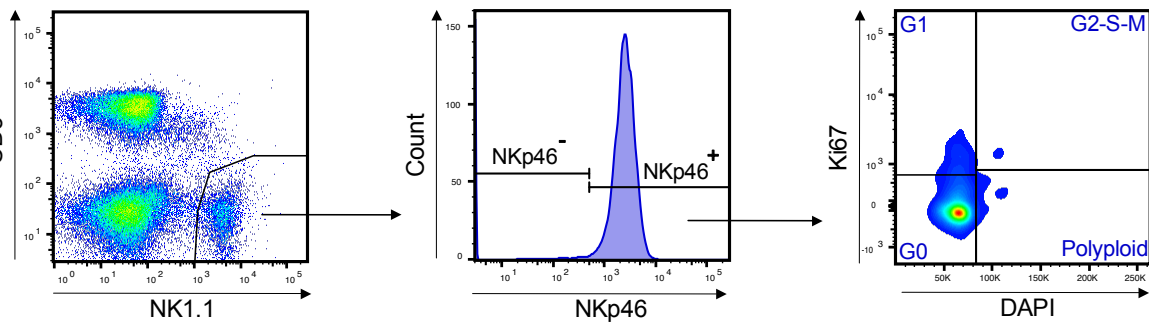

**Figure S3. Related to Figure 3. Impaired early control of MCMV infection in *Stat1<sup>ΔM/PMN</sup>* mice is partially NK cell independent.**

**(A)** Percentage of Granzyme B (GZMB) positive NK cells in the spleen 3 and 5 days after i.p. infection with  $5 \times 10^4$  PFU MCMV (n=8, N=2). **(B)** Quantification and representative FACS plots of NK cell frequencies before and after depletion (n=10, N=2). **(C)** Representative FACS plots showing gating strategy for DAPI/Ki67 staining of NKp46<sup>+</sup> NK cells (CD3<sup>-</sup> NK1.1<sup>+</sup>). **(A, B)** Mean values  $\pm$  SEM are given. ###  $p \leq 0.001$ , statistical significance relative to the PBS control; n, biological replicates; N, experimental repetitions.

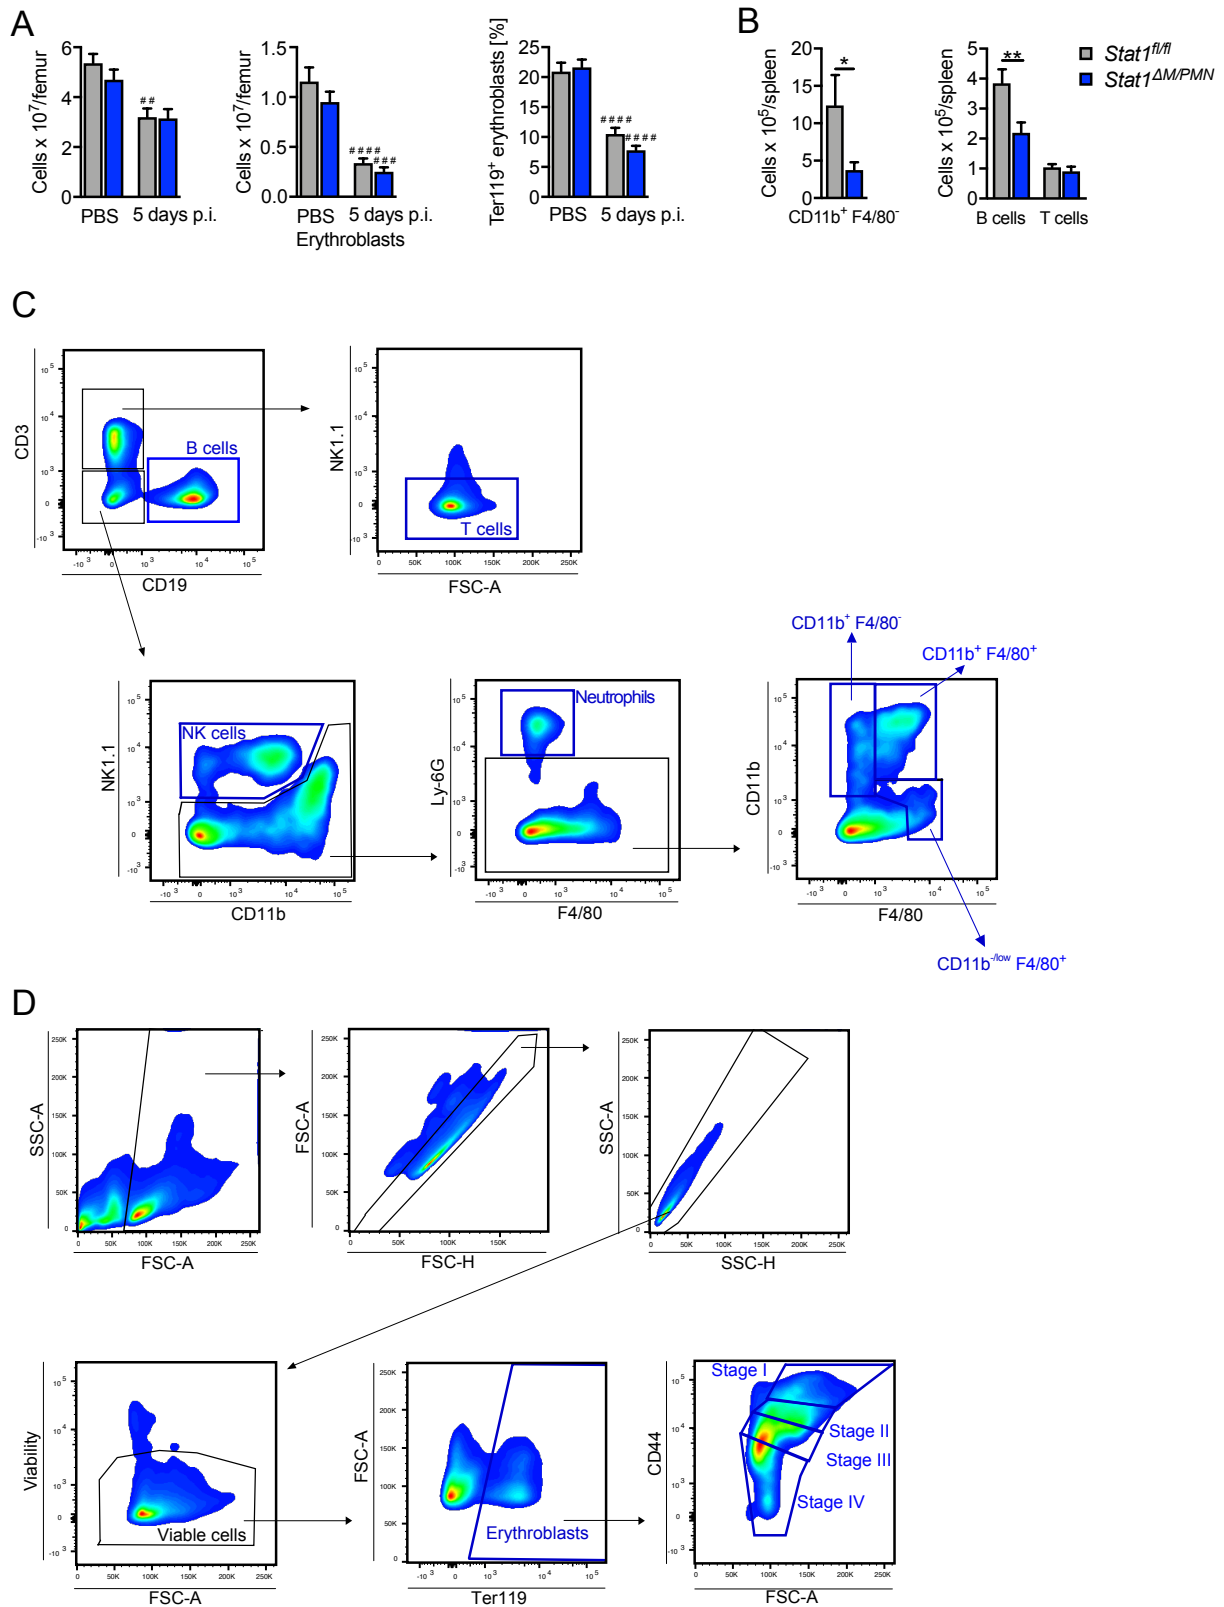

**Figure S4. Related to Figure 4. *Stat1<sup>ΔM/PMN</sup>* mice have impaired extramedullary hematopoiesis during MCMV infection.**

**(A)** Total number of cells, erythroblasts and percentage of erythroblasts per femur in *Stat1<sup>fl/fl</sup>* and *Stat1<sup>ΔM/PMN</sup>* mice 5 days p.i. with MCMV. (n=3-4, N=1). **(B)** Total numbers

of CD11b<sup>+</sup> F4/80<sup>-</sup> cells, B cells and T cells in *Stat1<sup>fl/fl</sup>* and *Stat1<sup>ΔM/PMN</sup>* mice 5 days p.i. with MCMV. **(A, B)** Mean values ± SEM are given (n=8, N=2). n, biological replicates; N, experimental repetitions; \*  $p \leq 0.05$ , \*\*  $p \leq 0.01$ , statistical significance between the genotypes; ##  $p \leq 0.01$ , ###  $p \leq 0.001$ , ####  $p \leq 0.0001$ , statistical significance relative to the PBS control. **(C)** Gating strategy for B cells (CD19<sup>+</sup> CD3<sup>-</sup>), T cells (CD19<sup>-</sup> CD3<sup>+</sup> NK1.1<sup>-</sup>), NK cells (CD19<sup>-</sup> CD3<sup>-</sup> CD11b<sup>-/int</sup> NK1.1<sup>+</sup>), neutrophils (CD3<sup>-</sup> CD19<sup>-</sup> NK1.1<sup>-</sup> F4/80<sup>-</sup> Ly-6G<sup>+</sup>), CD11b<sup>+</sup> F4/80<sup>-</sup> monocytes/DCs (CD3<sup>-</sup> CD19<sup>-</sup> NK1.1<sup>-</sup> Ly-6G<sup>-</sup> CD11b<sup>+</sup> F4/80<sup>-</sup>), CD11b<sup>+</sup> F4/80<sup>+</sup> macrophages/monocytes (CD3<sup>-</sup> CD19<sup>-</sup> NK1.1<sup>-</sup> Ly-6G<sup>-</sup> CD11b<sup>+</sup> F4/80<sup>+</sup>) and CD11b<sup>-/low</sup> F4/80<sup>+</sup> macrophages (CD3<sup>-</sup> CD19<sup>-</sup> NK1.1<sup>-</sup> Ly-6G<sup>-</sup> CD11b<sup>-/low</sup> F4/80<sup>+</sup>). **(D)** Gating strategy for erythroblasts (Ter119<sup>+</sup>) and erythroblast precursors, namely stage I (FSC<sup>hi</sup> CD44<sup>++</sup>), stage II (FSC<sup>int</sup> CD44<sup>+/int</sup>), stage III (FSC<sup>int</sup> CD44<sup>int/-</sup>) and stage IV (FSC<sup>low</sup> CD44<sup>-</sup>). Size exclusion was done for mature erythrocytes and reticulocytes.

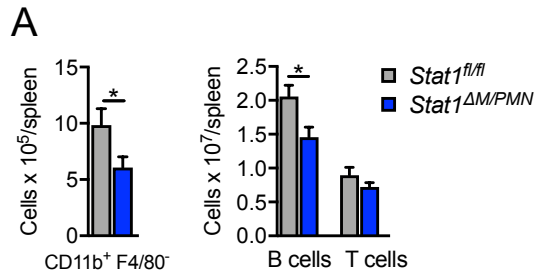

**Figure S5. Related to Figure 6.** *Stat1<sup>ΔM/PMN</sup>* mice have impaired extramedullary hematopoiesis during sterile inflammation.

**(A)** Total numbers of CD11b<sup>+</sup> F4/80<sup>-</sup> monocytes/DCs, B and T cells in *Stat1<sup>fl/fl</sup>* and *Stat1<sup>ΔM/PMN</sup>* mice 6 days post CpG-ODN injection. Mean values ± SEM are given (n=6-8; N=2). n, biological replicates; N, experimental repetitions; \* p ≤ 0.05.
